# Supplementary material for: Structural characterization of E22G Aβ1–42 fibrils via1H detected MAS NMR
Source: Royal Society of Chemistry journal article supplement (doi:10.1039/d4cp00553h), 2024-01-01
Supplement: d4cp00553h1.pdf [file d4cp00553h1.pdf]

**Supplementary Information**  
**Structural Characterization of E22G A $\beta$ <sub>1-42</sub> Fibrils via**  
**<sup>1</sup>H detected MAS NMR**

Natalie C. Golota<sup>1,2</sup>, Brian Michael<sup>1,2,5</sup>, Edward P. Saliba<sup>1,2,6</sup>, Sara Linse<sup>3</sup>, and Robert G.  
Griffin<sup>1,2\*</sup>

<sup>1</sup> Department of Chemistry, Massachusetts Institute of Technology, Cambridge, MA, 02139,  
USA.

<sup>2</sup> Francis Bitter Magnet Laboratory, Massachusetts Institute of Technology, Cambridge, MA,  
02139, USA

<sup>3</sup> Biochemistry and Structural Biology, Department of Chemistry, Lund University, Lund SE  
22100, Sweden

\* Corresponding author. Email: [rgg@mit.edu](mailto:rgg@mit.edu)

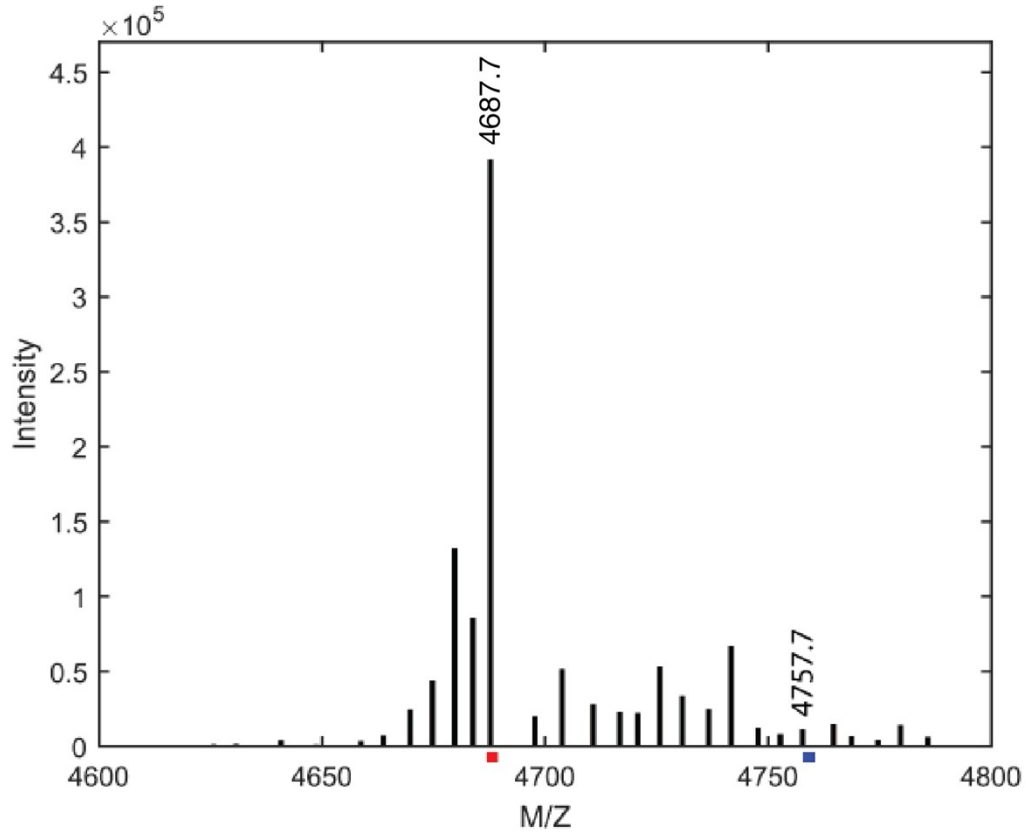

**Figure S1: Intact MS of A $\beta_{1-42}$  E22G Sample.** The predominant peak corresponding to 4687.7 m/z is the E22G-A $\beta_{1-42}$  corresponding to  $\sim 97.3\%$  isotopic enrichment. The distribution of small peaks can correspond to sample impurities or between 95-100% isotopic enrichment of the sample. The range of 97%-98% isotopic enrichment is provided in the red bar for E22G-A $\beta_{1-42}$  or the blue bar for the wild type A $\beta_{1-42}$ . Given the presence of a small peak minimally outside the range of 97% isotopic enrichment of A $\beta_{1-42}$ , tryptic digestion was performed to further probe the protein sequence. However, the predominant species in the sample corresponds to 97-98% isotopically enriched E22G-A $\beta_{1-42}$ .

**Table S1: Monoisotopic masses for the tryptic digest fragment LVFFAGDVGSNK of E22G A $\beta$ <sub>1-42</sub>.** In the B column, fragmentation is performed from N to C terminus while for fragmentation in the Y column fragmentation is performed from C to N.

| Sequence                    | Sequence # | B                 | Y                 | Sequence # |
|-----------------------------|------------|-------------------|-------------------|------------|
| L                           | 1          | 120.825-121.088   | 1322.894-1325.609 | 12         |
| V                           | 2          | 225.664-226.154   | 1203.076-1205.528 | 11         |
| F                           | 3          | 382.355-383.219   | 1098.237-1100.463 | 10         |
| F                           | 4          | 539.046-540.284   | 941.546-943.397   | 9          |
| A                           | 5          | 613.929-615.318   | 784.855-786.332   | 8          |
| G                           | 6          | 673.834-675.336   | 709.972-711.298   | 7          |
| D                           | 7          | 793.662-795.361   | 650.067-651.280   | 6          |
| V                           | 8          | 898.502-900.425   | 530.239-531.256   | 5          |
| G                           | 9          | 958.407-960.444   | 425.400-426.191   | 4          |
| S                           | 10         | 1049.281-1051.473 | 365.494-366.172   | 3          |
| N                           | 11         | 1169.092-1171.510 | 274.621-275.143   | 2          |
| K                           | 12         | 1304.884-1307.598 | 154.809-155.106   | 1          |
|                             |            |                   |                   |            |
| Total Monoisotopic mass (M) |            | 1321.887-1324.602 | 1322.662-1325.377 |            |
| (M+2H) <sup>2+</sup>        |            | 661.951-663.308   | 662.338-663.696   |            |

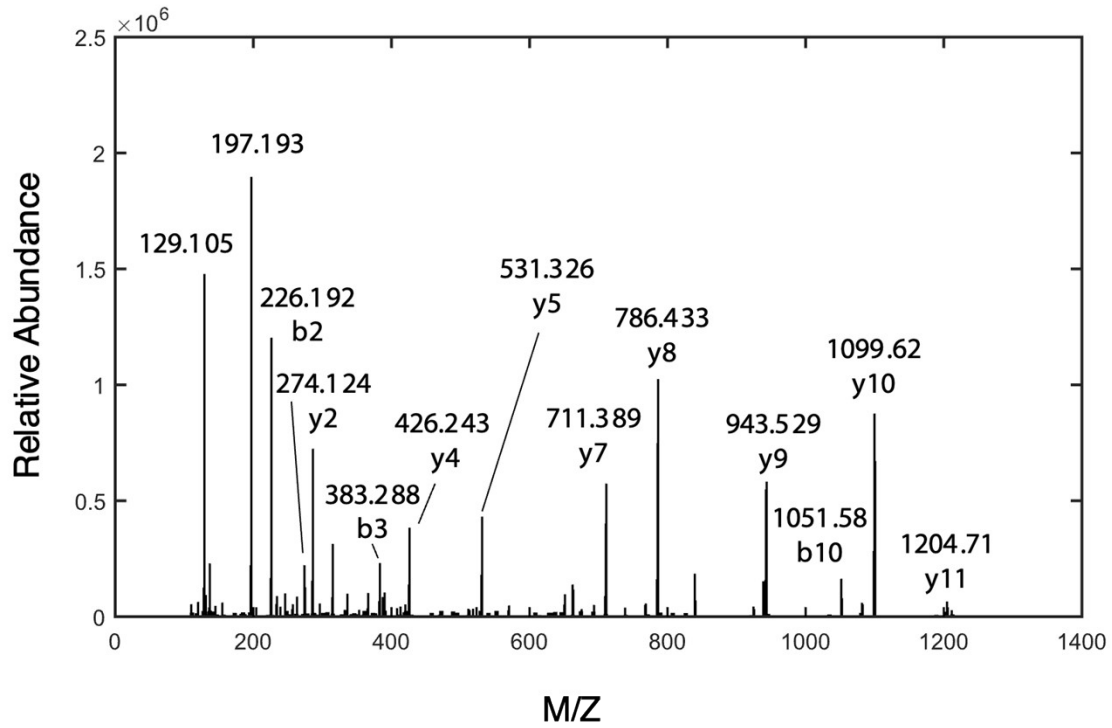

**Figure S2: MS2 fragment spectrum of the 662.908 m/z peak.** Overall, enough fragments are identified to confirm the E22G mutation was adopted and isotopically labeled at 97-100% enrichment. Tryptic digestion and subsequent fragmentation did not detect wild type  $A\beta_{1-42}$ .

**Table S2:** Acquisition parameters for MAS NMR experiments.

| Spectrum                         | Max Evolution Time (ms) |            |            | Number of complex points |       |       | Spectral Width (Hz/ppm) |             |             | C-C Mixing Time (ms) | Scans per point | Interscan delay (s) | Experiment time |
|----------------------------------|-------------------------|------------|------------|--------------------------|-------|-------|-------------------------|-------------|-------------|----------------------|-----------------|---------------------|-----------------|
|                                  | $\omega_1$              | $\omega_2$ | $\omega_3$ | $t_1$                    | $t_2$ | $t_3$ | $\omega_1$              | $\omega_2$  | $\omega_3$  |                      |                 |                     |                 |
| (H)NH GNNQQNY                    | 19.7                    | 15.9       |            | 160                      | 1024  |       | 4050/50                 | 32051/40    |             | N/A                  | 32              | 1.5                 | 2 h 27 min      |
| (H)CH GNNQQNY                    | 16.3                    | 12.56      |            | 460                      | 2048  |       | 14069/70                | 81521/102   |             | N/A                  | 32              | 1.5                 | 7 h 25 min      |
| hCCH-RFDR GNNQQNY                | 5.3                     | 5.3        | 10.2       | 128                      | 128   | 2048  | 12059/60                | 12059/60    | 100,000/125 | 1.7                  | 8               | 1.5                 | 2d 14 h 57 min  |
| hCC RFDR GNNQQNY                 | 8.5                     | 17.2       |            | 1024                     | 2048  |       | 60000/298.5             | 59523/296.1 |             | 1.6                  | 32              | 3                   | 1d 3h 34 min    |
| (H)NH E22G AB1-42                | 19.7                    | 15.9       |            | 160                      | 1024  |       | 4050/50                 | 32051/40    |             | N/A                  | 32              | 1.5                 | 2 h 27 min      |
| (H)CH E22G A $\beta_{1-42}$      | 16.3                    | 12.56      |            | 460                      | 2048  |       | 14069/70                | 81521/102   |             | N/A                  | 32              | 1.5                 | 7 h 25 min      |
| hCCHRFDR E22G A $\beta_{1-42}$   | 5.3                     | 5.3        | 10.2       | 128                      | 128   | 2048  | 12059/60                | 12059/60    | 100,000/125 | 1.4                  | 32              | 1.5                 | 10d 11 h 47 min |
| hCCH-TOCSY E22G A $\beta_{1-42}$ | 5.3                     | 5.3        | 10.2       | 128                      | 128   | 2048  | 12059/60                | 12059/60    | 100,000/125 | 9                    | 32              | 1.5                 | 10d 12 h 53 min |

| Res | C $\alpha$ | C $\beta$ | C $\gamma$ 1 | C $\delta$ 1 | C $\delta$ 2 | C $\epsilon$ |
|-----|------------|-----------|--------------|--------------|--------------|--------------|
| L17 |            | 44.68     | 29.23        |              | 25.25        |              |
| F19 | 60.16      |           |              |              |              |              |
| D23 |            | 41.3      |              |              |              |              |
| S26 | 56.2       | 65.3      |              |              |              |              |
| N27 | 53.81      | 41.4      |              |              |              |              |
| K28 | 54.76      | 34.84     |              | 29.22        |              | 41.63        |
| G29 | 48.21      |           |              |              |              |              |
| A30 | 49.13      | 21.03     |              |              |              |              |
| I31 |            | 44.65     | 27.14        |              |              |              |
| I32 | 59.98      | 41.29     | 27.05        |              |              |              |
| M35 | 54.75      | 36.25     |              |              |              |              |
| I41 | 60.137     | 39.76     |              | 13.73        |              |              |
| A42 | 52.42      | 19.62     |              |              |              |              |

**Table S3. Chemical Shifts assigned to E22G A $\beta$ <sub>1-42</sub> fibrils.**

| Res | C $\alpha$ | C $\beta$ | C $\gamma$ 1 | C $\delta$ 1 | C $\delta$ 2 | C $\epsilon$ |
|-----|------------|-----------|--------------|--------------|--------------|--------------|
| L17 |            | 44.62     | 28.6         |              | 25.24        |              |
| F19 | 59.86      |           |              |              |              |              |
| D23 |            | 40.88     |              |              |              |              |
| S26 | 54.96      | 65.97     |              |              |              |              |
| N27 | 52.76      | 42.57     |              |              |              |              |
| K28 | 54.69      | 34.85     |              | 29.62        |              | 41.8         |
| G29 | 48.22      |           |              |              |              |              |
| A30 | 50.22      | 20.99     |              |              |              |              |
| I31 |            | 43.94     |              | 27.2         |              |              |
| I32 | 59.72      | 40.84     | 27.17        |              |              |              |
| M35 | 54.34      | 36.28     |              |              |              |              |
| I41 | 59.7       | 39.57     |              | 14.09        |              |              |
| A42 | 52.3       | 20.18     |              |              |              |              |

**Table S4. Chemical shifts of wild type A $\beta$ <sub>1-42</sub> fibrils.** Published chemical shifts from Bahri, et al <sup>1</sup> and Colvin, et al <sup>2-3</sup> for wild type A $\beta$ <sub>1-42</sub> fibrils.

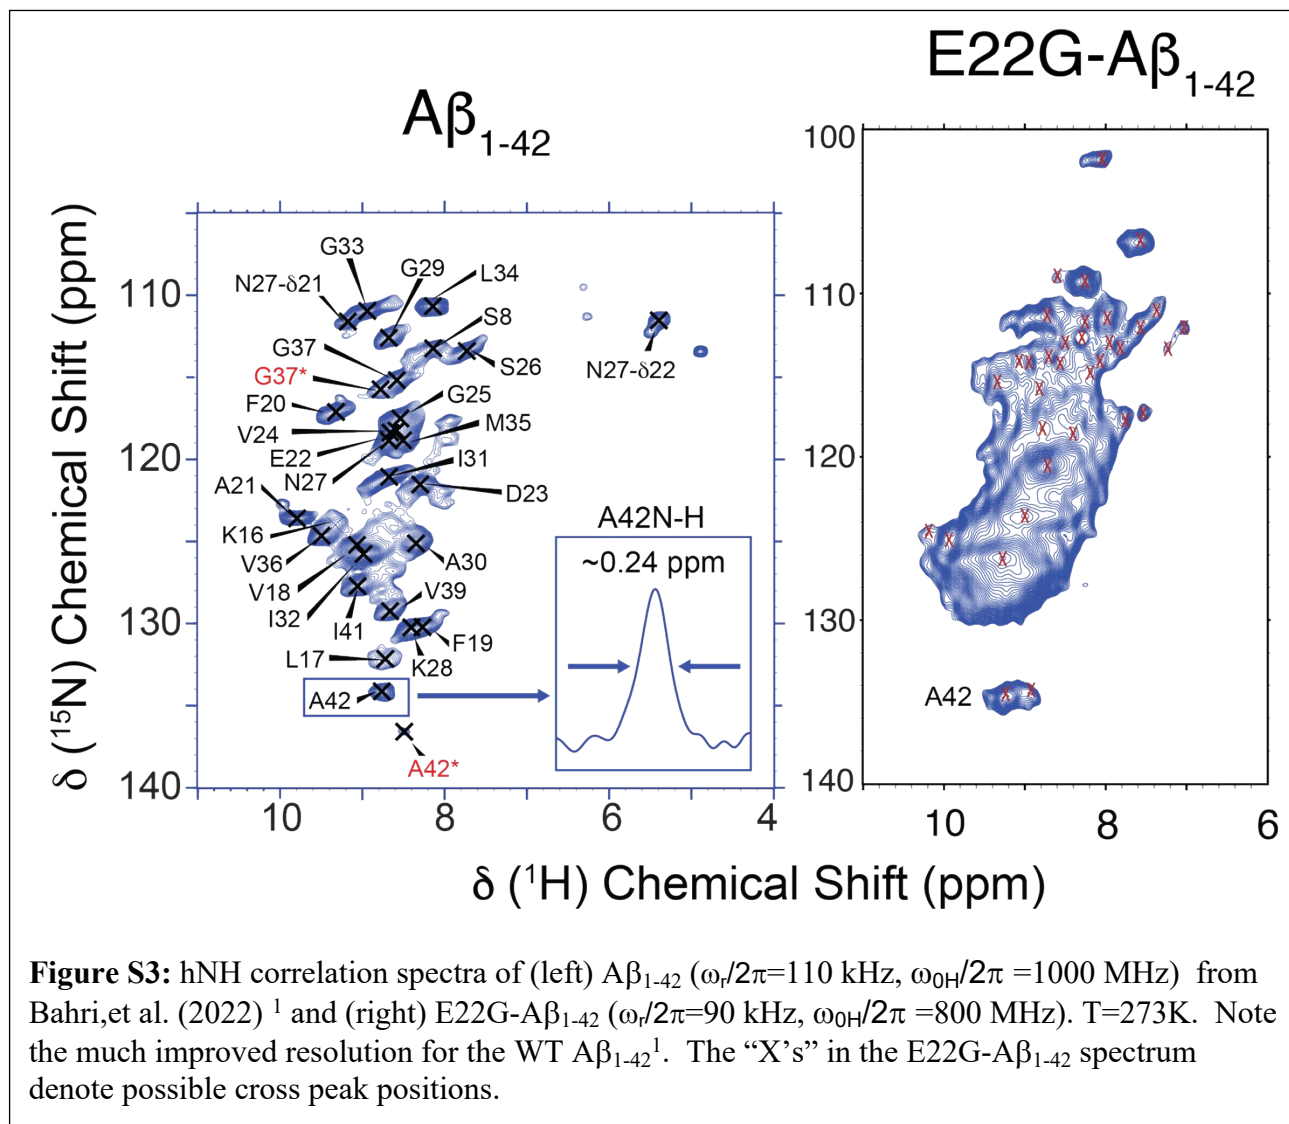

(1) Bahri, S.; Silvers, R.; Michael, B.; Jaudzems, K.; Lalli, D.; Casano, G.; Ouari, O.; Lesage, A.; Pintacuda, G.; Linse, S.; Griffin, R. G., 1h Detection and Dynamic Nuclear Polarization–Enhanced Nmr of Aβ<sub>1-42</sub> Fibrils, *Proc Natl Acad Sci USA* **2022**, *119*, e2114413119.

(2) Colvin, M. T.; Silvers, R.; Ni, Q. Z.; Can, T. V.; Sergeyev, I.; Rosay, M.; Donovan, K. J.; Michael, B.; Wall, J.; Linse, S.; Griffin, R. G., Atomic Resolution Structure of Monomeric α Beta(42) Amyloid Fibrils, *J Am Chem Soc* **2016**, *138*, 9663-9674.

(3) Colvin, M. T.; Andreas, L. B.; Chou, J. J.; Griffin, R. G., Proton Association Constants of His 37 in the Influenza-a M218-60 Dimer-of-Dimers, *Biochemistry* **2014**, *53*, 5987-5994.
